# Supplementary material
Source: publisher figshare collection journal article supplement (https://acs.figshare.com/ndownloader/files/4494376)
Supplement: Supplementary file 1 [file 4494376]

Archive with 2 entries (2 files):
- TableS1.pdf
- Figure-SI.pdf
