# Supplementary material
Source: publisher figshare collection journal article supplement (https://acs.figshare.com/ndownloader/files/4494376)
Supplement: Supplementary file 1 [file 4494376 › Figure-SI.pdf]

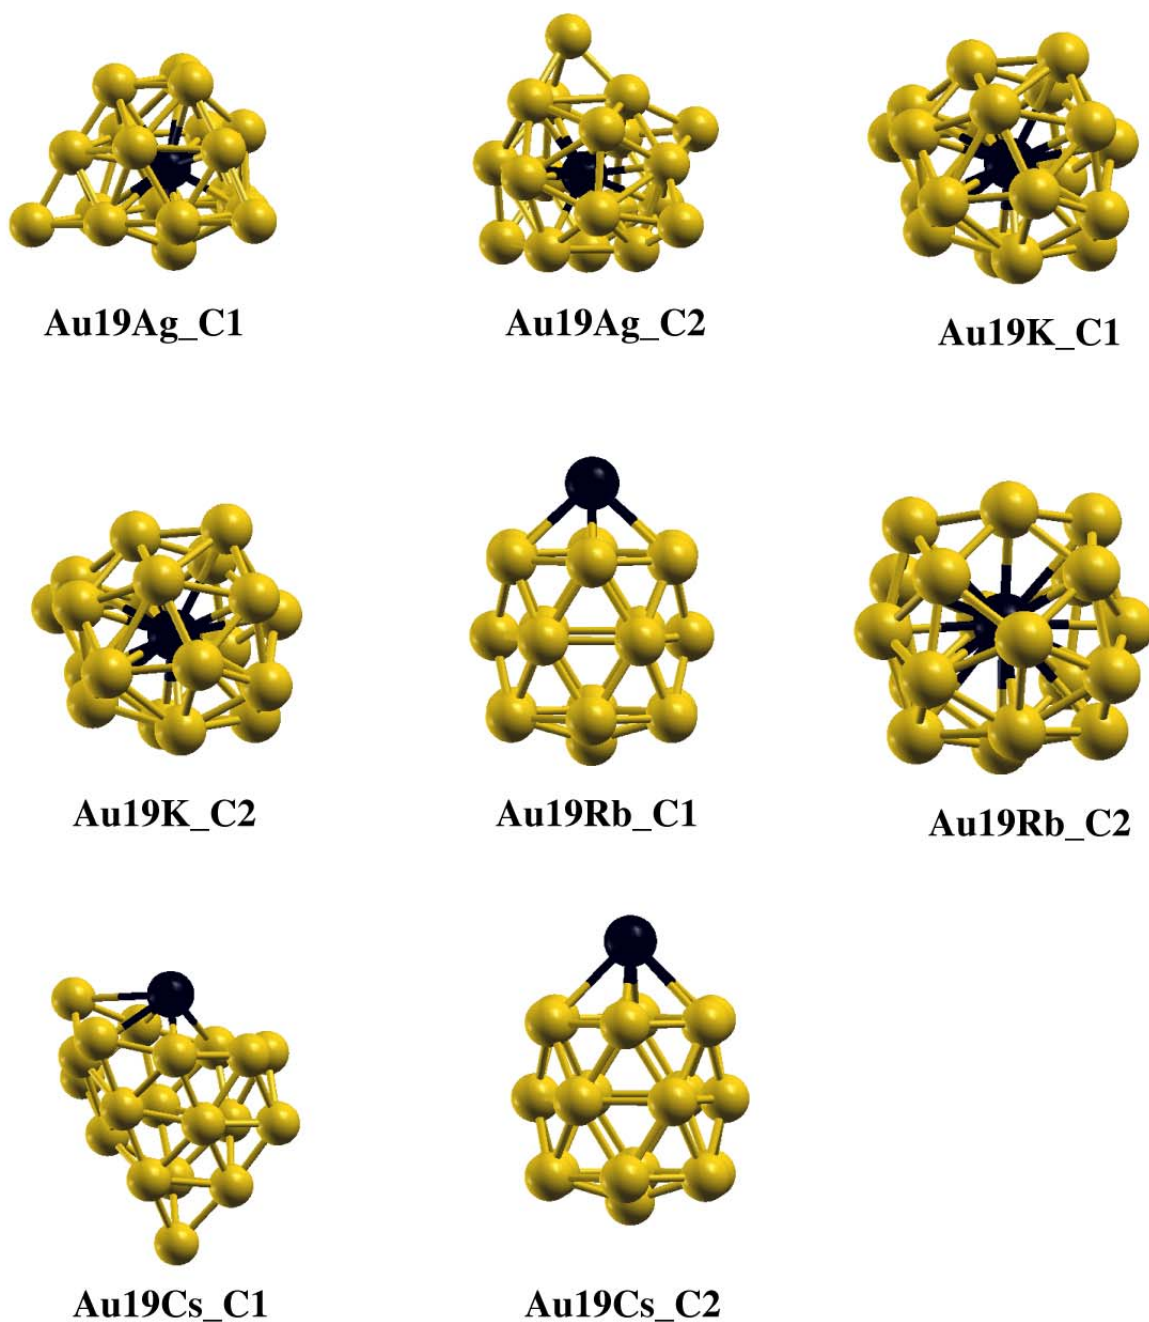

Figure S1. Structures of the low-energy cage-like isomers of  $\text{Au}_{19}\text{Ag}$ ,  $\text{Au}_{19}\text{Rb}$ , and  $\text{Au}_{19}\text{Cs}$  clusters
