# Supplementary material
Source: publisher figshare collection journal article supplement (https://acs.figshare.com/ndownloader/files/4494376)
Supplement: Supplementary file 1 [file 4494376 › TableS1.pdf]

**Structures and the Electronic Properties of Au<sub>19</sub>X Clusters (X=Li, Na, K, Rb, Cs, Cu, Ag)**

**Tapan K. Ghanty\*, Arup Banerjee, and Aparna Chakrabarti**

**Manuscript ID: jp-2009-06400t**

**Table S1. The binding energy per atom (BE) of cage-like Au<sub>19</sub>X cluster (X = K, Rb, Cs, and Ag) with endohedral doping.**

| System                 | Symmetry    | BE (eV) |
|------------------------|-------------|---------|
| Au <sub>19</sub> K_C1  | No Symmetry | 2.307   |
| Au <sub>19</sub> K_C2  | C(S)        | 2.290   |
| Au <sub>19</sub> Rb_C1 | C(6V)       | 2.289   |
| Au <sub>19</sub> Rb_C2 | C(2V)       | 2.272   |
| Au <sub>19</sub> Cs_C1 | No Symmetry | 2.309   |
| Au <sub>19</sub> Cs_C2 | C(6V)       | 2.294   |
| Au <sub>19</sub> Ag_C1 | C(3V)       | 2.311   |
| Au <sub>19</sub> Ag_C2 | C(S)        | 2.303   |
